# Supplementary material for: Association between medicated obstructive pulmonary disease, depression and subjective health: results from the population-based Gutenberg Health Study
Source: PubMed Central journal article supplement (PMC6934802; doi:10.1038/s41598-019-56440-9), 2019-12-27
Supplement: 41598_2019_56440_MOESM1_ESM.pdf [file 41598_2019_56440_MOESM1_ESM.pdf]

**Association between medicated obstructive pulmonary disease, depression and subjective health: results from the population-based Gutenberg Health Study**

Jasmin Ghaemi Kerahrodi, MD,<sup>1\*</sup> Elmar Brähler, PhD,<sup>1</sup> Jörg Wiltink, MD,<sup>1</sup> Matthias Michal, MD,<sup>1</sup> Andreas Schulz, PhD,<sup>3</sup> Phillip Wild, MD,<sup>3,4,5</sup> Thomas Münzel, MD,<sup>2,5</sup> Gerrit Toenges, PhD,<sup>7</sup> Karl Lackner, MD,<sup>6,5</sup> Norbert Pfeiffer, MD,<sup>8</sup> Manfred E. Beutel, MD<sup>1</sup>

<sup>1</sup> Department of Psychosomatic Medicine and Psychotherapy, University Medical Center of the Johannes Gutenberg University Mainz

<sup>2</sup> Center for Cardiology, Cardiology I, University Medical Center of the Johannes Gutenberg University, Mainz, Germany

<sup>3</sup> Preventive Cardiology and Preventive Medicine, Center for Cardiology, University Medical Center of the Johannes Gutenberg-University Mainz, Mainz, Germany

<sup>4</sup> Center for Thrombosis and Hemostasis, University Medical Center of the Johannes Gutenberg-University Mainz, Mainz, Germany

<sup>5</sup> DZHK (German Center for Cardiovascular Research), partner site RhineMain, Mainz

<sup>6</sup> Institute for Clinical Chemistry and Laboratory Medicine, University Medical Center of the Johannes Gutenberg University, Mainz, Germany

<sup>7</sup> Institute for Medical Biostatistics, Epidemiology and Informatics, University Medical Center of the Johannes Gutenberg-University Mainz, Germany

<sup>8</sup> Department of Ophthalmology, University Medical Center of the Johannes Gutenberg-University Mainz, Germany

\* Corresponding author

**Address correspondence to:** Jasmin Ghaemi Kerahrodi, Department of Psychosomatic Medicine and Psychotherapy, University Medical Center, Johannes Gutenberg-University, Untere Zahlbacher Straße 8, 55131 Mainz, Germany, Email: [jasmin.ghaemi@unimedizin-mainz.de](mailto:jasmin.ghaemi@unimedizin-mainz.de), Telephone: +49 6131 17-2912 / Fax: +49 6131 17-6688

Supplementary table S1: Multiple logistic regression model: predictors of depression (PHQ9≥10) for men and for women

|                                           | Men<br>(N = 7032, N = 429 events) |              |                  | Women<br>(N = 6825, N = 649 events) |              |                   |
|-------------------------------------------|-----------------------------------|--------------|------------------|-------------------------------------|--------------|-------------------|
|                                           | OR                                | 95% CI (L,U) | P                | OR                                  | 95% CI (L,U) | P                 |
| Age [5y]                                  | 0.963                             | 0.895, 1.036 | .31              | 0.969                               | 0.909, 1.033 | 0.33              |
| <b>Spirometry</b>                         |                                   |              |                  |                                     |              |                   |
| FEV1 (per SD)                             | 1.151                             | 0.985, 1.345 | .077             | 1.273                               | 1.061, 1.529 | <b>0.0094</b>     |
| COPD/Asthma (%)                           | 1.935                             | 1.232, 2.970 | <b>.0032</b>     | 1.604                               | 1.129, 2.250 | <b>0.0072</b>     |
| NYHA≥1 (%)                                | 2.316                             | 1.677, 3.180 | <b>&lt;.0001</b> | 2.213                               | 1.751, 2.790 | <b>&lt;0.0001</b> |
| <b>CVRFs, comorbid diseases</b>           |                                   |              |                  |                                     |              |                   |
| Diabetes (%)                              | 1.139                             | 0.799, 1.602 | .46              | 1.105                               | 0.778, 1.550 | 0.57              |
| Obesity (%)                               | 1.300                             | 1.006, 1.676 | <b>.044</b>      | 1.240                               | 0.991, 1.545 | 0.058             |
| Smoking (%)                               | 1.273                             | 0.981, 1.645 | .067             | 1.277                               | 1.015, 1.601 | <b>0.036</b>      |
| Hypertension (%)                          | 1.016                             | 0.795, 1.298 | .90              | 1.006                               | 0.808, 1.250 | 0.96              |
| Dyslipidemia (%)                          | 1.492                             | 1.175, 1.901 | <b>.0011</b>     | 1.261                               | 1.022, 1.553 | <b>0.030</b>      |
| CVD (%)                                   | 1.238                             | 0.895, 1.697 | .19              | 1.307                               | 0.946, 1.784 | 0.098             |
| Cancer (%)                                | 0.953                             | 0.602, 1.459 | .83              | 0.960                               | 0.699, 1.302 | 0.80              |
| <b>Social and behavioral</b>              |                                   |              |                  |                                     |              |                   |
| SES                                       | 0.986                             | 0.960, 1.013 | .30              | 0.975                               | 0.950, 1.000 | 0.050             |
| Partnership (%)                           | 1.880                             | 1.383, 2.581 | <b>&lt;.0001</b> | 0.784                               | 0.636, 0.969 | <b>0.023</b>      |
| Social support                            | 0.894                             | 0.869, 0.921 | <b>&lt;.0001</b> | 0.904                               | 0.883, 0.924 | <b>&lt;0.0001</b> |
| Loneliness (%)                            | 3.386                             | 2.551, 4.483 | <b>&lt;.0001</b> | 2.636                               | 2.124, 3.266 | <b>&lt;0.0001</b> |
| Alcohol abuse                             | 0.879                             | 0.485, 1.501 | .65              | 0.584                               | 0.243, 1.227 | 0.19              |
| Active sports (%)                         | 0.615                             | 0.482, 0.783 | <b>&lt;.0001</b> | 0.915                               | 0.757, 1.107 | 0.36              |
| <b>Mental</b>                             |                                   |              |                  |                                     |              |                   |
| Social Phobia (Mini-Spin≥6) (%)           | 4.452                             | 3.343, 5.910 | <b>&lt;.0001</b> | 4.065                               | 3.237, 5.099 | <b>&lt;0.0001</b> |
| Type D (%)                                | 3.256                             | 2.575, 4.120 | <b>&lt;.0001</b> | 2.159                               | 1.773, 2.627 | <b>&lt;0.0001</b> |
| Life events last 12 months (per 5 events) | 1.577                             | 1.293, 1.920 | <b>&lt;.0001</b> | 1.857                               | 1.566, 2.200 | <b>&lt;0.0001</b> |

Note: 95% CI [L, U] = 95% confidence interval [lower value, upper value].

p: p-value. Depression: (PHQ-9≥10). Social Phobia: Mini-Spin≥6. Life events last 12 months: per 5 events.
